# Supplementary material for: Genetic variations of MUC17 are associated with endometriosis development and related infertility
Source: PubMed Central journal article supplement (PMC4593232; doi:10.1186/s12881-015-0209-7), 2015-08-19
Supplement: 12881_2015_209_MOESM1_ESM.pdf [file 12881_2015_209_MOESM1_ESM.pdf]

Additional file 1. Probes used for analyzing SNPs in *MUC17* gene

| dbSNP rs#  | Allele frequency* |       | Amino acid change | ABI probe ID         |
|------------|-------------------|-------|-------------------|----------------------|
| rs4729645  | C:82%             | T:18% | Thr339Met         | AHAA0I0 <sup>b</sup> |
| rs10953316 | A:18%             | G:82% | Thr2355Thr        | AH6RM4Q <sup>b</sup> |
| rs74974199 | C:24%             | G:76% | Gly3932Arg        | AHBJYO8 <sup>b</sup> |
| rs4729655  | T:36%             | C:64% | NA <sup>a</sup>   | C__27935224_10       |
| rs4729656  | T:32%             | A:68% | NA <sup>a</sup>   | C__27978557_20       |

\* Allele frequencies listed are from Han Chinese population distributions in HapMap

database

<sup>a</sup> SNP within 3'-UTR region of *MUC17*

<sup>b</sup> Custom designed probe
